# Supplementary material for: The Effect of Sowing Density and Different Harvesting Stages on Yield and Some Forage Quality Characters of the White Sweet Clover (Melilotus albus)
Source: MDPI journal article supplement (doi:10.3390/agriculture12050575), 2022-04-20
Supplement: s1 [file s1]

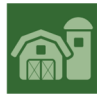

Article

# The Effect of Sowing Density and Different Harvesting Stages on Yield and Some Forage Quality Characters of the White Sweet Clover (*Melilotus albus*)

Patrycja Sowa-Borowiec <sup>1,2</sup>, Waław Jarecki <sup>3,\*</sup> and Małgorzata Dżugan <sup>1</sup>

<sup>1</sup> Department of Chemistry and Food Toxicology, University of Rzeszów, Ćwiklińskiej 1a, 35-601 Rzeszów, Poland; patrycja.sowa-borowiec@pk.edu.pl (P.S.-B.); mdzugan@ur.edu.pl (M.D.)

<sup>2</sup> Department of General and Inorganic Chemistry, Faculty of Chemical Engineering and Technology, Cracow University of Technology, Warszawska 24, 31-155, Cracow, Poland

<sup>3</sup> Department of Crop Production, University of Rzeszów, Zelwerowicza 4, 35-601 Rzeszów, Poland

\* Correspondence: wjarecki@ur.edu.pl or waław.jarecki@wp.pl

**Table S1a.** Plant measurements, yield and chemical composition of white sweet clover, mean values for interaction seeding density (S) x harvesting stage (H).

| Seeding density<br>[pcs.m <sup>-2</sup> ] | Harvesting stage | Plant population after emergence<br>[pcs.m <sup>-2</sup> ] | Plant height<br>[cm] | Green matter yield<br>[kg m <sup>-2</sup> ] | Dry matter yield<br>[kg m <sup>-2</sup> ] | Share of leaves<br>[%] | Total protein<br>[% DM] | Crude fat<br>[% DM] | Fiber<br>[% DM]    | Ash<br>[% DM]      |
|-------------------------------------------|------------------|------------------------------------------------------------|----------------------|---------------------------------------------|-------------------------------------------|------------------------|-------------------------|---------------------|--------------------|--------------------|
| 500                                       | A                | 341.78 <sup>a</sup>                                        | 46.79 <sup>a</sup>   | 0.90 <sup>a</sup>                           | 0.13 <sup>a</sup>                         | 40.82 <sup>c</sup>     | 22.16 <sup>b</sup>      | 2.30 <sup>a</sup>   | 33.33 <sup>a</sup> | 12.46 <sup>a</sup> |
|                                           | B                | 334.04 <sup>a</sup>                                        | 69.53 <sup>a</sup>   | 1.35 <sup>a</sup>                           | 0.25 <sup>a</sup>                         | 32.11 <sup>bc</sup>    | 17.62 <sup>abc</sup>    | 2.14 <sup>a</sup>   | 37.83 <sup>a</sup> | 11.00 <sup>a</sup> |
|                                           | C                | 324.20 <sup>a</sup>                                        | 157.98 <sup>b</sup>  | 2.74 <sup>ab</sup>                          | 0.70 <sup>bcd</sup>                       | 19.56 <sup>a</sup>     | 14.65 <sup>a</sup>      | 1.73 <sup>a</sup>   | 44.41 <sup>a</sup> | 8.52 <sup>a</sup>  |
| 1000                                      | A                | 538.77 <sup>b</sup>                                        | 46.68 <sup>a</sup>   | 1.15 <sup>a</sup>                           | 0.18 <sup>a</sup>                         | 40.68 <sup>c</sup>     | 20.59 <sup>bc</sup>     | 2.37 <sup>a</sup>   | 35.15 <sup>a</sup> | 11.83 <sup>a</sup> |
|                                           | B                | 522.87 <sup>b</sup>                                        | 69.83 <sup>a</sup>   | 1.66 <sup>ab</sup>                          | 0.31 <sup>ab</sup>                        | 30.73 <sup>b</sup>     | 17.60 <sup>abc</sup>    | 1.99 <sup>a</sup>   | 40.78 <sup>a</sup> | 11.18 <sup>a</sup> |
|                                           | C                | 512.67 <sup>b</sup>                                        | 154.48 <sup>b</sup>  | 2.92 <sup>ab</sup>                          | 0.78 <sup>cd</sup>                        | 19.73 <sup>a</sup>     | 14.82 <sup>a</sup>      | 1.75 <sup>a</sup>   | 43.19 <sup>a</sup> | 8.34 <sup>a</sup>  |
| 1500                                      | A                | 743.12 <sup>c</sup>                                        | 47.24 <sup>a</sup>   | 1.29 <sup>a</sup>                           | 0.22 <sup>a</sup>                         | 40.69 <sup>c</sup>     | 22.42 <sup>b</sup>      | 2.57 <sup>a</sup>   | 35.17 <sup>a</sup> | 12.06 <sup>a</sup> |
|                                           | B                | 739.64 <sup>c</sup>                                        | 67.45 <sup>a</sup>   | 2.05 <sup>ab</sup>                          | 0.40 <sup>abc</sup>                       | 31.10 <sup>b</sup>     | 16.02 <sup>ab</sup>     | 2.12 <sup>a</sup>   | 42.19 <sup>a</sup> | 10.98 <sup>a</sup> |
|                                           | C                | 727.08 <sup>c</sup>                                        | 148.33 <sup>b</sup>  | 3.52 <sup>b</sup>                           | 0.95 <sup>d</sup>                         | 19.13 <sup>a</sup>     | 14.96 <sup>a</sup>      | 1.65 <sup>a</sup>   | 40.92 <sup>a</sup> | 8.45 <sup>a</sup>  |
| SxH                                       | p-value          | 0.9962                                                     | 0.9856               | 0.9841                                      | 0.9139                                    | 0.9963                 | 0.5739                  | 0.9703              | 0.6268             | 0.9949             |
|                                           | F                | 0.0428                                                     | 0.0862               | 0.0909                                      | 0.2367                                    | 0.042                  | 0.745                   | 0.1280              | 0.661              | 0.050              |
|                                           | df               | 4                                                          | 4                    | 4                                           | 4                                         | 4                      | 4                       | 4                   | 4                  | 4                  |

Harvesting Stages : A – before budding, B – budding, C – full flowering. Different letters in the same column indicate significant differences (Tukey's honest significant difference test,  $p < 0.05$ ), Sx H - ANOVA p-value for interactions between independent variables (S- seeding density and H harvesting stage), F—the F-test, df- the degrees of freedom.

**Table S1b.** The content of macro- and microelements of white sweet clover, mean values for interaction seeding density (S) x harvesting stage (H).

| Seeding density<br>[pcs. m <sup>-2</sup> ] | Harvesting stage | Ca<br>[mg g <sup>-1</sup> ] | K<br>[mg g <sup>-1</sup> ] | Mg<br>[mg g <sup>-1</sup> ] | P<br>[m g <sup>-1</sup> ] | S<br>[mg g <sup>-1</sup> ] | Fe<br>[mg kg <sup>-1</sup> ] | Mn<br>[mg kg <sup>-1</sup> ] | Mo<br>[mg kg <sup>-1</sup> ] | Cu<br>[mg kg <sup>-1</sup> ] | Zn<br>[mg kg <sup>-1</sup> ] |
|--------------------------------------------|------------------|-----------------------------|----------------------------|-----------------------------|---------------------------|----------------------------|------------------------------|------------------------------|------------------------------|------------------------------|------------------------------|
| 500                                        | A                | 13.91 <sup>a</sup>          | 26.01 <sup>c</sup>         | 2.65 <sup>a</sup>           | 4.58 <sup>a</sup>         | 3.55 <sup>a</sup>          | 151.32 <sup>c</sup>          | 17.91 <sup>a</sup>           | 2.73 <sup>a</sup>            | 8.61 <sup>c</sup>            | 18.18 <sup>a</sup>           |
|                                            | B                | 11.65 <sup>a</sup>          | 24.12 <sup>b</sup>         | 2.86 <sup>a</sup>           | 4.12 <sup>a</sup>         | 3.23 <sup>a</sup>          | 95.97 <sup>b</sup>           | 15.45 <sup>a</sup>           | 3.64 <sup>a</sup>            | 7.79 <sup>d</sup>            | 17.91 <sup>a</sup>           |
|                                            | C                | 10.90 <sup>a</sup>          | 14.24 <sup>a</sup>         | 2.96 <sup>a</sup>           | 3.19 <sup>a</sup>         | 2.55 <sup>a</sup>          | 63.15 <sup>a</sup>           | 12.31 <sup>a</sup>           | 1.92 <sup>a</sup>            | 4.93 <sup>a</sup>            | 17.01 <sup>a</sup>           |
| 1000                                       | A                | 13.63 <sup>a</sup>          | 24.60 <sup>b</sup>         | 2.55 <sup>a</sup>           | 4.20 <sup>a</sup>         | 3.65 <sup>a</sup>          | 118.51 <sup>c</sup>          | 16.67 <sup>a</sup>           | 3.60 <sup>a</sup>            | 6.88 <sup>cd</sup>           | 16.62 <sup>a</sup>           |
|                                            | B                | 12.71 <sup>a</sup>          | 24.62 <sup>b</sup>         | 3.14 <sup>a</sup>           | 4.15 <sup>a</sup>         | 3.36 <sup>a</sup>          | 107.83 <sup>b</sup>          | 17.01 <sup>a</sup>           | 3.67 <sup>a</sup>            | 7.55 <sup>d</sup>            | 16.59 <sup>a</sup>           |
|                                            | C                | 10.06 <sup>a</sup>          | 14.67 <sup>a</sup>         | 3.02 <sup>a</sup>           | 3.61 <sup>a</sup>         | 2.55 <sup>a</sup>          | 53.47 <sup>a</sup>           | 11.32 <sup>a</sup>           | 1.97 <sup>a</sup>            | 4.95 <sup>a</sup>            | 16.62 <sup>a</sup>           |
| 1500                                       | A                | 13.00 <sup>a</sup>          | 24.24 <sup>b</sup>         | 2.86 <sup>a</sup>           | 4.29 <sup>a</sup>         | 3.42 <sup>a</sup>          | 132.23 <sup>c</sup>          | 18.81 <sup>a</sup>           | 3.72 <sup>a</sup>            | 6.61 <sup>bc</sup>           | 17.01 <sup>a</sup>           |
|                                            | B                | 12.45 <sup>a</sup>          | 24.21 <sup>b</sup>         | 2.75 <sup>a</sup>           | 4.43 <sup>a</sup>         | 3.34 <sup>a</sup>          | 92.15 <sup>b</sup>           | 14.66 <sup>a</sup>           | 3.45 <sup>a</sup>            | 5.71 <sup>ab</sup>           | 18.34 <sup>a</sup>           |
|                                            | C                | 10.06 <sup>a</sup>          | 16.33 <sup>a</sup>         | 3.15 <sup>a</sup>           | 3.84 <sup>a</sup>         | 2.60 <sup>a</sup>          | 61.55 <sup>a</sup>           | 12.99 <sup>a</sup>           | 2.48 <sup>a</sup>            | 5.18 <sup>a</sup>            | 17.96 <sup>a</sup>           |
|                                            | p-value          | 0.9098                      | 0.9358                     | 0.8624                      | 0.9533                    | 0.9922                     | 0.8810                       | 0.7723                       | 0.9771                       | 0.2209                       | 0.9161                       |
| SxH                                        | F                | 0.2435                      | 0.1986                     | 0.3176                      | 0.1651                    | 0.0624                     | 0.2894                       | 0.4483                       | 0.1110                       | 1.5863                       | 0.233                        |
|                                            | df               | 4                           | 4                          | 4                           | 4                         | 4                          | 4                            | 4                            | 4                            | 4                            | 4                            |

Harvesting stage: A – before budding, B – budding, C – full flowering. Different letters in the same column indicate significant differences (Tukey's honest significant difference test,  $p < 0.05$ ), Sx H - ANOVA p-value for interactions between independent variables (S- seeding density and H harvesting stage), F—the F-test, df- the degrees of freedom.

**Table S2a.** Plant measurements, yield and chemical composition of white sweet clover, mean values for interaction seeding density (S) × years (Y)

| Seeding density<br>[pcs.m <sup>-2</sup> ] | Years   | Plant population after emergence<br>[pcs. m <sup>-2</sup> ] | Plant height<br>[cm] | Green matter yield<br>[kg m <sup>-2</sup> ] | Dry matter yield<br>[kg m <sup>-2</sup> ] | Share of leaves<br>[%] | Total protein<br>[% DM] | Crude fat<br>[% DM] | Fiber<br>[% DM]    | Ash<br>[% DM]      |
|-------------------------------------------|---------|-------------------------------------------------------------|----------------------|---------------------------------------------|-------------------------------------------|------------------------|-------------------------|---------------------|--------------------|--------------------|
| 500                                       | 2018    | 352.56 <sup>a</sup>                                         | 95.24 <sup>a</sup>   | 1.85 <sup>a</sup>                           | 0.38 <sup>a</sup>                         | 32.10 <sup>a</sup>     | 18.11 <sup>a</sup>      | 2.21 <sup>a</sup>   | 35.55 <sup>a</sup> | 11.99 <sup>a</sup> |
|                                           | 2019    | 332.56 <sup>a</sup>                                         | 98.88 <sup>a</sup>   | 1.39 <sup>a</sup>                           | 0.37 <sup>a</sup>                         | 28.05 <sup>a</sup>     | 17.51 <sup>a</sup>      | 1.58 <sup>a</sup>   | 38.94 <sup>a</sup> | 9.73 <sup>a</sup>  |
|                                           | 2020    | 314.89 <sup>a</sup>                                         | 80.18 <sup>a</sup>   | 1.75 <sup>a</sup>                           | 0.34 <sup>a</sup>                         | 32.34 <sup>a</sup>     | 18.81 <sup>a</sup>      | 2.38 <sup>a</sup>   | 41.08 <sup>a</sup> | 10.26 <sup>a</sup> |
| 1000                                      | 2018    | 543.21 <sup>b</sup>                                         | 89.41 <sup>a</sup>   | 1.90 <sup>a</sup>                           | 0.37 <sup>a</sup>                         | 31.20 <sup>a</sup>     | 18.17 <sup>a</sup>      | 1.89 <sup>a</sup>   | 36.42 <sup>a</sup> | 11.90 <sup>a</sup> |
|                                           | 2019    | 523.22 <sup>b</sup>                                         | 100.15 <sup>a</sup>  | 1.32 <sup>a</sup>                           | 0.37 <sup>a</sup>                         | 28.83 <sup>a</sup>     | 16.81 <sup>a</sup>      | 1.63 <sup>a</sup>   | 42.80 <sup>a</sup> | 9.08 <sup>a</sup>  |
|                                           | 2020    | 507.88 <sup>b</sup>                                         | 81.43 <sup>a</sup>   | 2.51 <sup>a</sup>                           | 0.51 <sup>a</sup>                         | 30.76 <sup>a</sup>     | 18.04 <sup>a</sup>      | 2.59 <sup>a</sup>   | 39.90 <sup>a</sup> | 10.36 <sup>a</sup> |
| 1500                                      | 2018    | 767.22 <sup>c</sup>                                         | 84.68 <sup>a</sup>   | 2.03 <sup>a</sup>                           | 0.43 <sup>a</sup>                         | 31.37 <sup>a</sup>     | 18.69 <sup>a</sup>      | 2.33 <sup>a</sup>   | 35.85 <sup>a</sup> | 12.44 <sup>a</sup> |
|                                           | 2019    | 734.67 <sup>c</sup>                                         | 98.83 <sup>a</sup>   | 1.81 <sup>a</sup>                           | 0.51 <sup>a</sup>                         | 29.01 <sup>a</sup>     | 15.34 <sup>a</sup>      | 1.65 <sup>a</sup>   | 42.49 <sup>a</sup> | 9.06 <sup>a</sup>  |
|                                           | 2020    | 708.00 <sup>c</sup>                                         | 79.50 <sup>a</sup>   | 3.03 <sup>a</sup>                           | 0.62 <sup>a</sup>                         | 30.54 <sup>a</sup>     | 19.37 <sup>a</sup>      | 2.35 <sup>a</sup>   | 39.95 <sup>a</sup> | 9.99 <sup>a</sup>  |
| S×Y                                       | p-vaule | 0.9963                                                      | 0.9999               | 0.9188                                      | 0.9817                                    | 0.9996                 | 0.9529                  | 0.7872              | 0.9293             | 0.9860             |
|                                           | F       | 0.0098                                                      | 0.0082               | 0.2286                                      | 0.0981                                    | 0.0143                 | 0.1659                  | 0.4270              | 0.210              | 0.0851             |
|                                           | df      | 4                                                           | 4                    | 4                                           | 4                                         | 4                      | 4                       | 4                   | 4                  | 4                  |

Different letters in the same column indicate significant differences (Tukey's honest significant difference test,  $p < 0.05$ ), Sx Y - ANOVA p-value for interactions between independent variables (S- seeding density and Y years), F— the F-test, df- the degrees of freedom.

**Table S2b.** – The content of macro- and microelements of white sweet clover, mean values for interaction seeding density (S) x years (Y)

| Seeding density<br>[pcs. m <sup>-2</sup> ] | Years | Ca<br>[mg g <sup>-1</sup> ] | K<br>[mg g <sup>-1</sup> ] | Mg<br>[mg g <sup>-1</sup> ] | P<br>[mg g <sup>-1</sup> ] | S<br>[mg g <sup>-1</sup> ] | Fe<br>[mg kg <sup>-1</sup> ] | Mn<br>[mg kg <sup>-1</sup> ] | Mo<br>[mg kg <sup>-1</sup> ] | Cu<br>[mg kg <sup>-1</sup> ] | Zn<br>[mg kg <sup>-1</sup> ] |
|--------------------------------------------|-------|-----------------------------|----------------------------|-----------------------------|----------------------------|----------------------------|------------------------------|------------------------------|------------------------------|------------------------------|------------------------------|
| 500                                        | 2018  | 12.55 <sup>a</sup>          | 23.98 <sup>a</sup>         | 3.36 <sup>a</sup>           | 2.72 <sup>a</sup>          | 2.86 <sup>a</sup>          | 81.02 <sup>a</sup>           | 18.28 <sup>a</sup>           | 2.90 <sup>abc</sup>          | 7.89 <sup>a</sup>            | 15.79 <sup>a</sup>           |
|                                            | 2019  | 10.61 <sup>a</sup>          | 20.53 <sup>a</sup>         | 2.85 <sup>a</sup>           | 4.39 <sup>abc</sup>        | 2.75 <sup>a</sup>          | 84.60 <sup>a</sup>           | 11.37 <sup>a</sup>           | 4.33 <sup>bc</sup>           | 6.30 <sup>a</sup>            | 19.10 <sup>a</sup>           |
|                                            | 2020  | 13.30 <sup>a</sup>          | 19.87 <sup>a</sup>         | 2.24 <sup>a</sup>           | 4.78 <sup>bc</sup>         | 3.72 <sup>a</sup>          | 144.82 <sup>b</sup>          | 16.02 <sup>a</sup>           | 1.05 <sup>a</sup>            | 7.15 <sup>a</sup>            | 18.73 <sup>a</sup>           |
| 1000                                       | 2018  | 11.25 <sup>a</sup>          | 25.81 <sup>a</sup>         | 3.35 <sup>a</sup>           | 2.91 <sup>a</sup>          | 2.92 <sup>a</sup>          | 64.67 <sup>a</sup>           | 15.60 <sup>a</sup>           | 3.65 <sup>abc</sup>          | 6.23 <sup>a</sup>            | 13.07 <sup>a</sup>           |
|                                            | 2019  | 11.33 <sup>a</sup>          | 19.55 <sup>a</sup>         | 3.00 <sup>a</sup>           | 4.28 <sup>abc</sup>        | 2.88 <sup>a</sup>          | 99.01 <sup>ab</sup>          | 13.15 <sup>a</sup>           | 4.17 <sup>abc</sup>          | 6.68 <sup>a</sup>            | 18.17 <sup>a</sup>           |
|                                            | 2020  | 13.82 <sup>a</sup>          | 18.53 <sup>a</sup>         | 2.35 <sup>a</sup>           | 4.77 <sup>bc</sup>         | 3.77 <sup>a</sup>          | 116.08 <sup>b</sup>          | 16.25 <sup>a</sup>           | 1.42 <sup>ab</sup>           | 6.47 <sup>a</sup>            | 18.58 <sup>a</sup>           |
| 1500                                       | 2018  | 12.02 <sup>a</sup>          | 25.04 <sup>a</sup>         | 3.35 <sup>a</sup>           | 3.09 <sup>ab</sup>         | 3.05 <sup>a</sup>          | 67.90 <sup>a</sup>           | 18.38 <sup>a</sup>           | 4.71 <sup>c</sup>            | 4.83 <sup>a</sup>            | 15.40 <sup>a</sup>           |
|                                            | 2019  | 9.50 <sup>a</sup>           | 19.75 <sup>a</sup>         | 2.99 <sup>a</sup>           | 4.33 <sup>abc</sup>        | 2.60 <sup>a</sup>          | 101.54 <sup>b</sup>          | 11.70 <sup>a</sup>           | 3.67 <sup>abc</sup>          | 5.90 <sup>a</sup>            | 18.18 <sup>a</sup>           |
|                                            | 2020  | 13.99 <sup>a</sup>          | 19.98 <sup>a</sup>         | 2.42 <sup>a</sup>           | 5.15 <sup>c</sup>          | 3.72 <sup>a</sup>          | 116.50 <sup>b</sup>          | 16.38 <sup>a</sup>           | 1.27 <sup>ab</sup>           | 6.65 <sup>a</sup>            | 19.73 <sup>a</sup>           |
| p-vaule                                    |       | 0.7228                      | 0.9907                     | 0.9464                      | 0.9572                     | 0.9768                     | 0.9064                       | 0.7614                       | 0.4275                       | 0.5732                       | 0.8523                       |
| SxY                                        |       | 0.519                       | 0.0682                     | 0.1788                      | 0.1570                     | 0.1116                     | 0.2491                       | 0.4638                       | 1.0117                       | 0.7461                       | 0.3327                       |
| df                                         |       | 4                           | 4                          | 4                           | 4                          | 4                          | 4                            | 4                            | 4                            | 4                            | 4                            |

Different letters in the same column indicate significant differences (Tukey's honest significant difference test,  $p < 0.05$ ), Sx Y - ANOVA p-value for interactions between independent variables (S- seeding density and Y years), F—the F-test, df- the degrees of freedom.

**Table S3a.** Plant measurements, yield and chemical composition of white sweet clover, mean values for interaction harvesting stages (H) x years (Y).

| Harvesting stages | Years   | Plant population after emergence [pcs. m <sup>-2</sup> ] | Plant height [cm]   | Green matter yield [kg m <sup>-2</sup> ] | Dry matter yield [kg m <sup>-2</sup> ] | Share of leaves [%] | Total protein [% DM] | Crude fat [% DM]   | Fiber [% DM]        | Ash [% DM]         |
|-------------------|---------|----------------------------------------------------------|---------------------|------------------------------------------|----------------------------------------|---------------------|----------------------|--------------------|---------------------|--------------------|
| A                 | 2018    | 561.22 <sup>a</sup>                                      | 38.71 <sup>a</sup>  | 1.68 <sup>abc</sup>                      | 0.27 <sup>ab</sup>                     | 40.26 <sup>d</sup>  | 22.73 <sup>d</sup>   | 2.78 <sup>c</sup>  | 31.53 <sup>a</sup>  | 14.27 <sup>d</sup> |
|                   | 2019    | 541.22 <sup>a</sup>                                      | 56.97 <sup>bc</sup> | 0.66 <sup>a</sup>                        | 0.11 <sup>a</sup>                      | 40.36 <sup>d</sup>  | 20.91 <sup>cd</sup>  | 1.77 <sup>ab</sup> | 37.40 <sup>ab</sup> | 10.83 <sup>c</sup> |
|                   | 2020    | 521.22 <sup>a</sup>                                      | 45.04 <sup>ab</sup> | 1.01 <sup>a</sup>                        | 0.15 <sup>a</sup>                      | 41.57 <sup>d</sup>  | 21.52 <sup>cd</sup>  | 2.69 <sup>bc</sup> | 34.72 <sup>a</sup>  | 11.20 <sup>c</sup> |
| B                 | 2018    | 556.63 <sup>a</sup>                                      | 60.89 <sup>c</sup>  | 1.76 <sup>abc</sup>                      | 0.35 <sup>ab</sup>                     | 31.00 <sup>c</sup>  | 16.21 <sup>b</sup>   | 1.84 <sup>ab</sup> | 38.70 <sup>ab</sup> | 11.81 <sup>c</sup> |
|                   | 2019    | 529.96 <sup>a</sup>                                      | 76.08 <sup>d</sup>  | 1.05 <sup>ab</sup>                       | 0.21 <sup>a</sup>                      | 30.51 <sup>c</sup>  | 16.40 <sup>b</sup>   | 1.76 <sup>ab</sup> | 39.94 <sup>ab</sup> | 10.30 <sup>c</sup> |
|                   | 2020    | 509.96 <sup>a</sup>                                      | 69.83 <sup>cd</sup> | 2.25 <sup>bc</sup>                       | 0.40 <sup>ab</sup>                     | 32.43 <sup>c</sup>  | 18.62 <sup>bc</sup>  | 2.65 <sup>bc</sup> | 42.17 <sup>b</sup>  | 11.05 <sup>c</sup> |
| C                 | 2018    | 545.10 <sup>a</sup>                                      | 169.70 <sup>f</sup> | 2.33 <sup>c</sup>                        | 0.57 <sup>b</sup>                      | 23.41 <sup>b</sup>  | 16.04 <sup>b</sup>   | 1.82 <sup>ab</sup> | 37.58 <sup>ab</sup> | 10.26 <sup>c</sup> |
|                   | 2019    | 519.26 <sup>a</sup>                                      | 164.82 <sup>f</sup> | 2.81 <sup>cd</sup>                       | 0.93 <sup>c</sup>                      | 15.01 <sup>a</sup>  | 12.34 <sup>a</sup>   | 1.33 <sup>a</sup>  | 46.89 <sup>c</sup>  | 6.69 <sup>a</sup>  |
|                   | 2020    | 499.55 <sup>a</sup>                                      | 126.23 <sup>e</sup> | 4.04 <sup>e</sup>                        | 0.93 <sup>c</sup>                      | 19.64 <sup>ab</sup> | 16.07 <sup>b</sup>   | 1.99 <sup>ab</sup> | 44.05 <sup>bc</sup> | 8.36 <sup>b</sup>  |
| HxY               | p-vaule | 0.9998                                                   | 0.0000              | 0.0030                                   | 0.0016                                 | 0.0042              | 0.0442               | 0.0509             | 0.0267              | 0.0002             |
|                   | F       | 0.0024                                                   | 29.318              | 6.0151                                   | 6.7704                                 | 5.570               | 3.045                | 2.786              | 1.421               | 9.58               |
|                   | df      | 4                                                        | 4                   | 4                                        | 4                                      | 4                   | 4                    | 4                  | 4                   | 4                  |

Harvesting stages: A – before budding, B – budding, C – full flowering. Different letters in the same column indicate significant differences (Tukey's honest significant difference test,  $p < 0.05$ ), Hx Y - ANOVA p-value for interactions between independent variables (H- harvesting stage and Y-years), F—the F-test, df- the degrees of freedom.

**Table S3b.** The content of macro- and microelements of white sweet clover, mean values for interaction harvesting stage (H) x years (Y).

| Harvesting stage | Years | Ca<br>[mg g <sup>-1</sup> ] | K<br>[mg g <sup>-1</sup> ] | Mg<br>[mg g <sup>-1</sup> ] | P<br>[mg g <sup>-1</sup> ] | S<br>[mg g <sup>-1</sup> ] | Fe<br>[mg kg <sup>-1</sup> ] | Mn<br>[mg kg <sup>-1</sup> ] | Mo<br>[mg kg <sup>-1</sup> ] | Cu<br>[mg kg <sup>-1</sup> ] | Zn<br>[mg kg <sup>-1</sup> ] |
|------------------|-------|-----------------------------|----------------------------|-----------------------------|----------------------------|----------------------------|------------------------------|------------------------------|------------------------------|------------------------------|------------------------------|
| A                | 2018  | 13.92 <sup>bc</sup>         | 29.45 <sup>d</sup>         | 3.21 <sup>a</sup>           | 3.08 <sup>ab</sup>         | 3.41 <sup>bc</sup>         | 113.65 <sup>bc</sup>         | 20.09 <sup>c</sup>           | 4.08 <sup>b</sup>            | 7.86 <sup>c</sup>            | 14.95 <sup>b</sup>           |
|                  | 2019  | 11.24 <sup>ab</sup>         | 24.87 <sup>c</sup>         | 2.68 <sup>a</sup>           | 4.89 <sup>d</sup>          | 3.15 <sup>b</sup>          | 102.74 <sup>bc</sup>         | 14.05 <sup>abcd</sup>        | 4.83 <sup>b</sup>            | 7.45 <sup>bc</sup>           | 18.67 <sup>d</sup>           |
|                  | 2020  | 15.38 <sup>c</sup>          | 20.53 <sup>bc</sup>        | 2.16 <sup>a</sup>           | 5.10 <sup>d</sup>          | 4.06 <sup>c</sup>          | 185.67 <sup>d</sup>          | 19.25 <sup>cd</sup>          | 1.13 <sup>a</sup>            | 6.80 <sup>b</sup>            | 18.90 <sup>d</sup>           |
| B                | 2018  | 11.62 <sup>ab</sup>         | 29.23 <sup>d</sup>         | 3.27 <sup>a</sup>           | 3.47 <sup>bc</sup>         | 3.16 <sup>b</sup>          | 54.56 <sup>ab</sup>          | 18.40 <sup>cd</sup>          | 4.66 <sup>b</sup>            | 6.92 <sup>b</sup>            | 16.39 <sup>c</sup>           |
|                  | 2019  | 11.01 <sup>ab</sup>         | 22.47 <sup>bc</sup>        | 3.11 <sup>a</sup>           | 4.39 <sup>cd</sup>         | 2.85 <sup>ab</sup>         | 118.80 <sup>bc</sup>         | 12.77 <sup>ab</sup>          | 4.50 <sup>b</sup>            | 6.67 <sup>b</sup>            | 18.17 <sup>d</sup>           |
|                  | 2020  | 14.18 <sup>bc</sup>         | 21.25 <sup>bc</sup>        | 2.36 <sup>a</sup>           | 4.85 <sup>d</sup>          | 3.93 <sup>c</sup>          | 122.60 <sup>bc</sup>         | 15.95 <sup>bcd</sup>         | 1.60 <sup>a</sup>            | 7.47 <sup>bc</sup>           | 18.13 <sup>d</sup>           |
| C                | 2018  | 10.28 <sup>a</sup>          | 16.14 <sup>b</sup>         | 3.59 <sup>b</sup>           | 2.16 <sup>a</sup>          | 2.25 <sup>a</sup>          | 45.38 <sup>a</sup>           | 13.77 <sup>abc</sup>         | 2.53 <sup>ab</sup>           | 4.18 <sup>a</sup>            | 12.92 <sup>a</sup>           |
|                  | 2019  | 9.20 <sup>a</sup>           | 12.49 <sup>a</sup>         | 3.04 <sup>b</sup>           | 3.73 <sup>bc</sup>         | 2.23 <sup>a</sup>          | 63.67 <sup>ab</sup>          | 9.40 <sup>a</sup>            | 2.83 <sup>ab</sup>           | 4.76 <sup>a</sup>            | 18.65 <sup>d</sup>           |
|                  | 2020  | 11.54 <sup>ab</sup>         | 16.60 <sup>ab</sup>        | 2.49 <sup>a</sup>           | 4.75 <sup>d</sup>          | 3.21 <sup>b</sup>          | 69.13 <sup>ab</sup>          | 13.45 <sup>abc</sup>         | 1.00 <sup>a</sup>            | 6.00 <sup>b</sup>            | 20.02 <sup>e</sup>           |
| p-value          |       | 0.5065                      | 0.0001                     | 0.0754                      | 0.0400                     | 0.7647                     | 0.0028                       | 0.7691                       | 0.3220                       | 0.3995                       | 0.0636                       |
| H x Y            | F     | 0.860                       | 11.442                     | 2.542                       | 3.141                      | 0.459                      | 6.0723                       | 0.453                        | 1.2597                       | 1.0714                       | 2.700                        |
| df               |       | 4                           | 4                          | 4                           | 4                          | 4                          | 4                            | 4                            | 4                            | 4                            | 4                            |

Harvesting stage: A – before budding, B – budding, C – full flowering. Different letters in the same column indicate significant differences (Tukey's honest significant difference test,  $p < 0.05$ ), H x Y - ANOVA p-value for interactions between independent variables (H- harvesting stage and Y-years), F—the F-test, df- the degrees of freedom.

**Table S4a.** Coumarin content in *Melilotus albus* leaves and stems, mean values for interactions.

| Seeding density<br>[pcs. m <sup>-2</sup> ] | Harvesting<br>stage | Leaves<br>[mg g <sup>-1</sup> ] | Stems<br>[mg g <sup>-1</sup> ] |
|--------------------------------------------|---------------------|---------------------------------|--------------------------------|
| 500                                        | A                   | 1.80 <sup>a</sup>               | 2.05 <sup>c</sup>              |
|                                            | B                   | 1.13 <sup>a</sup>               | 1.72 <sup>b</sup>              |
|                                            | C                   | 0.82 <sup>a</sup>               | 0.57 <sup>a</sup>              |
| 1000                                       | A                   | 1.83 <sup>a</sup>               | 2.46 <sup>c</sup>              |
|                                            | B                   | 1.18 <sup>a</sup>               | 1.56 <sup>b</sup>              |
|                                            | C                   | 0.85 <sup>a</sup>               | 0.60 <sup>a</sup>              |
| 1500                                       | A                   | 1.63 <sup>a</sup>               | 2.35 <sup>c</sup>              |
|                                            | B                   | 1.10 <sup>a</sup>               | 1.45 <sup>b</sup>              |
|                                            | C                   | 0.81 <sup>a</sup>               | 0.60 <sup>a</sup>              |
| SxH                                        | p-value             | 0.9959                          | 0.1826                         |
|                                            | F                   | 0.0444                          | 1.752                          |
|                                            | df                  | 4                               | 4                              |
| Seeding density<br>[pcs. m <sup>-2</sup> ] | Years               | Leaves<br>[mg g <sup>-1</sup> ] | Stems<br>[mg g <sup>-1</sup> ] |
| 500                                        | 2018                | 1.39 <sup>a</sup>               | 1.49 <sup>a</sup>              |
|                                            | 2019                | 0.85 <sup>a</sup>               | 1.48 <sup>a</sup>              |
|                                            | 2020                | 1.52 <sup>a</sup>               | 1.37 <sup>a</sup>              |
| 1000                                       | 2018                | 1.48 <sup>a</sup>               | 1.51 <sup>a</sup>              |
|                                            | 2019                | 0.86 <sup>a</sup>               | 1.69 <sup>a</sup>              |
|                                            | 2020                | 1.52 <sup>a</sup>               | 1.42 <sup>a</sup>              |
| 1500                                       | 2018                | 1.30 <sup>a</sup>               | 1.47 <sup>a</sup>              |
|                                            | 2019                | 0.83 <sup>a</sup>               | 1.60 <sup>a</sup>              |
|                                            | 2020                | 1.41 <sup>a</sup>               | 1.33 <sup>a</sup>              |
| SxY                                        | p-value             | 0.9989                          | 0.9997                         |
|                                            | F                   | 0.0230                          | 0.0112                         |
|                                            | df                  | 4                               | 4                              |

Harvesting stages: A – before budding, B – budding, C – full flowering. Different letters in the same column indicate significant differences (Tukey's honest significant difference test,  $p < 0.05$ ) ANOVA p value for main interactions effects: (S × H, S × Y) between (S- seeding density, H- harvesting stage and Y years), F—the F-test, df- the degrees of freedom.



**Table S4b.** Coumarin content in *Melilotus albus* leaves and stems, mean values for interactions.

| Harvesting stage | Years | Leaves<br>[mg g <sup>-1</sup> ] | Stems<br>[mg g <sup>-1</sup> ] |
|------------------|-------|---------------------------------|--------------------------------|
| A                | 2018  | 1.97 <sup>c</sup>               | 2.32 <sup>c</sup>              |
|                  | 2019  | 1.33 <sup>b</sup>               | 2.39 <sup>c</sup>              |
|                  | 2020  | 2.16 <sup>c</sup>               | 2.15 <sup>c</sup>              |
| B                | 2018  | 1.36 <sup>b</sup>               | 1.50 <sup>b</sup>              |
|                  | 2019  | 1.10 <sup>b</sup>               | 1.89 <sup>b</sup>              |
|                  | 2020  | 0.96 <sup>a</sup>               | 1.33 <sup>b</sup>              |
| C                | 2018  | 0.69 <sup>a</sup>               | 0.65 <sup>a</sup>              |
|                  | 2019  | 0.71 <sup>a</sup>               | 0.49 <sup>a</sup>              |
|                  | 2020  | 0.83 <sup>a</sup>               | 0.64 <sup>a</sup>              |
| p-value          |       | 0.0000                          | 0.0425                         |
| HxY              | F     | 29.420                          | 3.083                          |
| df               |       | 4                               | 4                              |

Harvesting stages: A – before budding, B – budding, C – full flowering. Different letters in the same column indicate significant differences (Tukey's honest significant difference test,  $p < 0.05$ ), Hx Y - ANOVA p-value for interactions between independent variables (H- harvesting stage and Y-years), F – the F-test, df- the degrees of freedom.
